# Supplementary material for: Boron nitride nanotubes as a heat sinking and stress-relaxation layer for high performance light-emitting diodes
Source: Royal Society of Chemistry journal article supplement (doi:10.1039/c7nr04508e), 2017-01-01
Supplement: c7nr04508e1.pdf [file c7nr04508e1.pdf]

## Supporting information

# Boron nitride nanotube as a heat sinking and stress-relaxation layer for high performance light-emitting diode

Tae Hoon Seo<sup>a</sup>, Gun Hee Lee<sup>b</sup>, Ah Hyun Park<sup>c</sup>, Hyunjin Cho<sup>a</sup>, Jun-Hee Kim<sup>a</sup>, S. Chandramohan<sup>d</sup>, Seong-Ran Jeon<sup>e</sup>, Se Gyu Jang<sup>a</sup>, Myung Jong Kim<sup>a,\*</sup> and Eun-Kyung Suh<sup>b,\*</sup>

---

<sup>a</sup>Applied Quantum Composites Research Center, Korea Institute of Science and Technology, Jeonbuk 55324, Republic of Korea.

<sup>b</sup>School of semiconductor and Chemical Engineering, Semiconductor Physics Research Center, Chonbuk National University, Jeonju 54899, Republic of Korea

<sup>c</sup>Korea Atomic Energy Research Institute, Jeonbuk 56212, Republic of Korea

<sup>d</sup>Department of Physics and Nanotechnology, SRM University, Kattankulathur 603 203, Tamil Nadu, India

<sup>e</sup>Korea Photonics Technology Institute (KOPTI), Gwangju 61007, Republic of Korea

† E-mail: myung@kist.re.re, eksuh@jbnu.ac.kr.

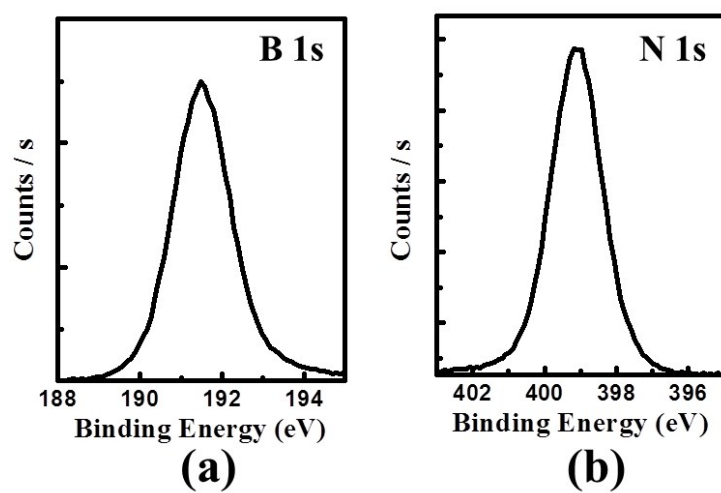

**Figure S-1.** X-ray photoelectron spectroscopy (XPS) spectra of B and N 1s core levels measured from the BNNTs.

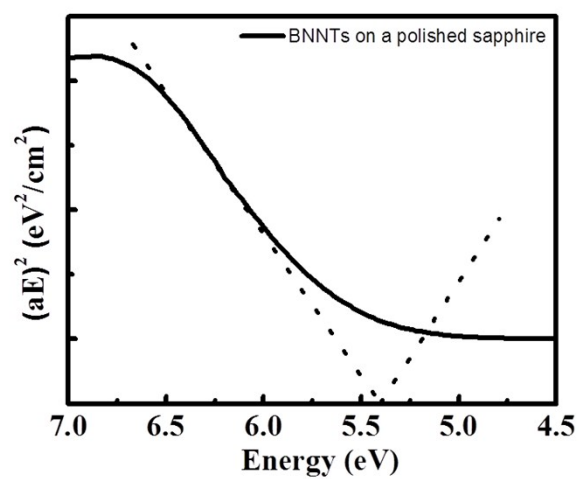

**Figure S-2.** Ultraviolet-visible absorption spectrum is taken to investigate the optical bandgap of the BNNTs. The band gap is estimated to be 5.4 eV.

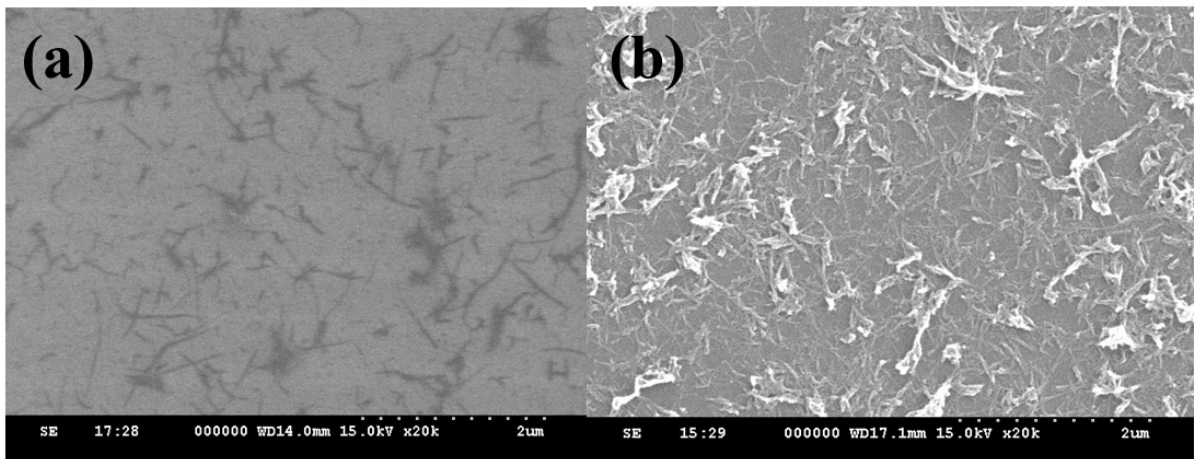

**Figure S-3.** SEM images of BNNTs formed by spin coating and spray coating methods on a sapphire substrate.

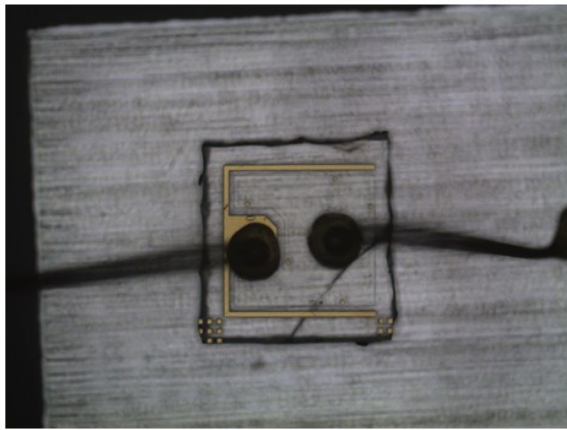

**(a)**

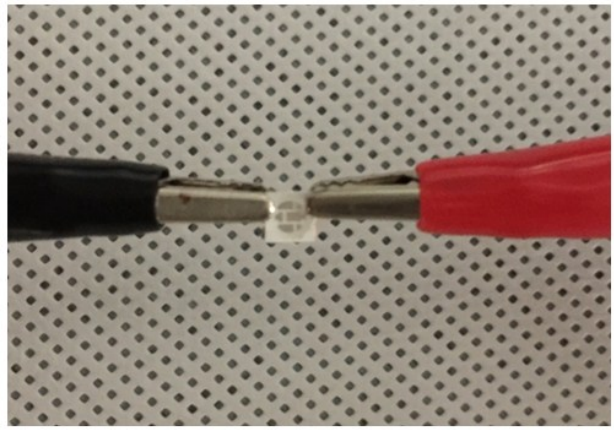

**(b)**

**Figure S-4.** (a) An optical image of a packaged LED chip. (b) A photograph of a packaged LED chip with an alligator clip for a current injection.

Collector

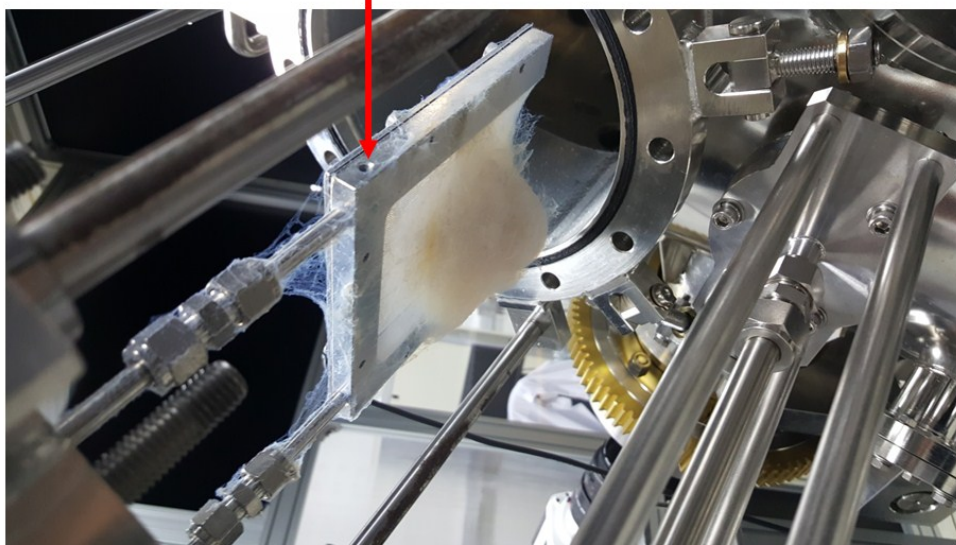

**Figure S-5.** (a) A photograph of BNNTs synthesized at the collector

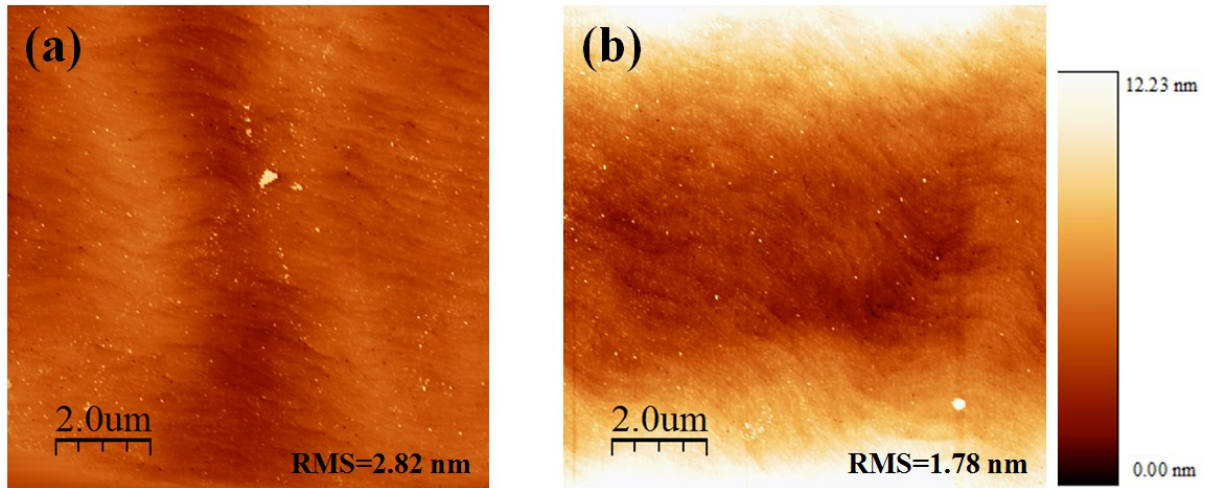

**Figure S-6.** (a) and (b) AFM images of GaN epilayers on SS and BSS for  $10 \times 10 \mu\text{m}^2$ , respectively
